# Supplementary material for: Elevated Temperature May Affect Nectar Microbes, Nectar Sugars, and Bumble Bee Foraging Preference
Source: PubMed Central journal article supplement (PMC9436853; doi:10.1007/s00248-021-01881-x), 2021-10-01
Supplement: 248_2021_1881_MOESM2_ESM.pdf [file 248_2021_1881_MOESM2_ESM.pdf]

Online Resource 1. Results from Texas A&M University Proteomics department's established plant nectar free amino acid HPLC assay.

| Amino Acid | mg /ml |
|------------|--------|
| ASP        | 0.27   |
| GLU        | 0.31   |
| ASN        | 0.81   |
| SER        | 0.46   |
| GLN        | 1.68   |
| HIS        | 0.60   |
| GLY        | 0.28   |
| THR        | 0.16   |
| ALA        | 0.42   |
| ARG        | 0.38   |
| TYR        | 0.06   |
| VAL        | 0.62   |
| MET        | 0.06   |
| TRP        | 0.33   |
| PHE        | 0.09   |
| ILE        | 0.17   |
| LEU        | 0.21   |
| LYS        | 0.21   |
| PRO        | 1.27   |
| Sum:       | 8.41   |
|            |        |

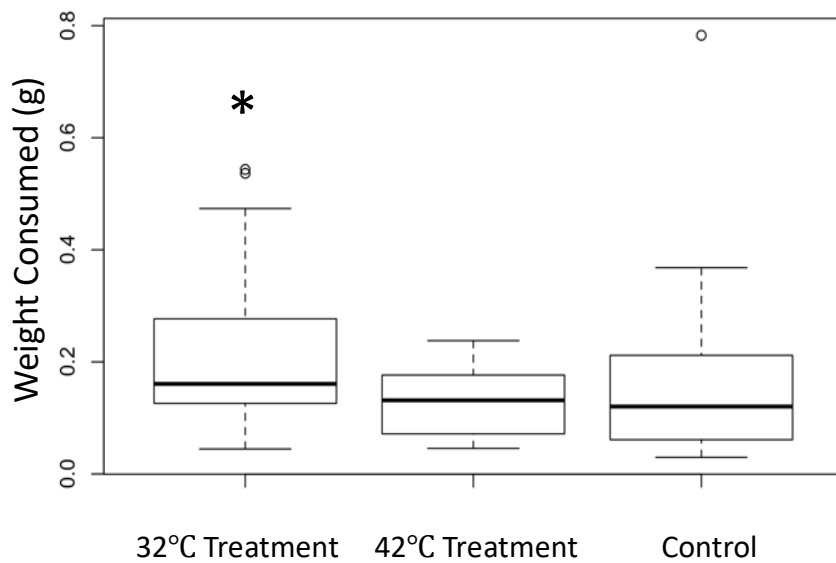

Online Resource 3. Bumble bee choice assay from preliminary experiment. Bumble bees were offered a choice between nectar inoculated with microbes and incubated at 32°C, 42°C or sterile synthetic nectar. Bumble bees consumed more nectar with a microbial community and incubated at 32°C ( $F= 7.1945$ ,  $p = 0.00118$ )
